# Supplementary material for: Renal Cell Carcinoma Surgical Treatment Disparities in American Indian/Alaska Natives and Hispanic Americans in Arizona
Source: MDPI journal article supplement (doi:10.3390/ijerph19031185), 2022-01-21
Supplement: s1 [file s1]

## Supplementary Materials

**Supplementary Table S1** Stage I RCC patient characteristics among Mexican Americans in Arizona Cancer Registry.

|                               | Mexican (n=285) | P      | US-Born Mexican (n=120) | Mexico-Born Mexican (n=97) | P     |
|-------------------------------|-----------------|--------|-------------------------|----------------------------|-------|
| Age, median (IQR)             | 63 (52-71))     | 0.01   | 65.5 (57-74))           | 62 (52-68)                 | 0.01  |
| Gender, n (%)                 |                 | 0.28   |                         |                            | 0.21  |
| Male                          | 167 (58.6)      |        | 77 (64.2)               | 54 (55.7)                  |       |
| Female                        | 118 (41.4)      |        | 43 (35.8)               | 43 (44.3)                  |       |
| Grade, n (%)                  |                 | 0.81   |                         |                            | 0.38  |
| 1&2                           | 163 (74.1)      |        | 68 (75.6)               | 51 (68.9)                  |       |
| 3&4                           | 57 (25.9)       |        | 22 (24.4)               | 23 (31.1)                  |       |
| Marital Status                |                 | <0.001 |                         |                            | 0.23  |
| Married                       | 148 (51.9)      |        | 55 (45.8)               | 56 (57.7)                  |       |
| Single                        | 53 (18.6)       |        | 21 (17.5)               | 15 (15.5)                  |       |
| Separated/Divorced/Widowed    | 77 (27.0)       |        | 39 (32.5)               | 25 (25.8)                  |       |
| Unknown                       | 7 (2.5)         |        | 5 (4.2)                 | 1 (1.0)                    |       |
| RCC Histologic Subtype, n (%) |                 | <0.001 |                         |                            | 0.37  |
| Clear Cell                    | 173 (86.1)      |        | 70 (82.4)               | 64 (90.1)                  |       |
| Papillary                     | 13 (6.5)        |        | 8 (9.4)                 | 2 (2.8)                    |       |
| Chromophobe                   | 7 (3.5)         |        | 2 (2.4)                 | 2 (2.8)                    |       |
| Others                        | 8 (4.0)         |        | 5 (5.9)                 | 3 (4.2)                    |       |
| Recurrence, n (%)             |                 | 0.008  |                         |                            | 0.053 |
| No                            | 177 (79.0)      |        | 75 (77.3)               | 77 (88.5)                  |       |
| Yes                           | 47 (21.0)       |        | 22 (22.7)               | 10 (11.5)                  |       |
| RUCC 2013, n (%)              |                 | 0.06   |                         |                            | 0.87  |
| 1 or 2                        | 218 (76.5)      |        | 92 (76.7)               | 73 (75.3)                  |       |
| 3-7                           | 67 (23.5)       |        | 28 (23.3)               | 24 (24.7)                  |       |
| High School Education, n (%)  |                 | <0.001 |                         |                            | 0.004 |
| ≥90%                          | 34 (11.9)       |        | 18 (15.0)               | 5 (5.2)                    |       |
| ≥70%, <90%                    | 114 (40.0)      |        | 57 (47.5)               | 36 (37.1)                  |       |
| <70%                          | 137 (48.1)      |        | 45 (37.5)               | 56 (57.7)                  |       |
| Unemployment, n (%)           |                 | <0.001 |                         |                            | 0.048 |
| <5%                           | 87 (30.5)       |        | 42 (35.0)               | 20 (20.6)                  |       |
| ≥5, <10%                      | 139 (48.8)      |        | 60 (50.0)               | 55 (56.7)                  |       |
| ≥10%                          | 59 (20.7)       |        | 18 (15.0)               | 22 (22.7)                  |       |
| Poverty rate, n (%)           |                 | <0.001 |                         |                            | 0.045 |
| <25%                          | 66 (23.2)       |        | 35 (29.2)               | 15 (15.5)                  |       |
| ≥25, <50%                     | 96 (33.7)       |        | 40 (33.3)               | 34 (35.1)                  |       |
| ≥50%                          | 123 (43.2)      |        | 45 (37.5)               | 48 (49.5)                  |       |

$P^1$  comparing NHWs and Mexican Americans

$P^2$  comparing U.S.-born and Mexico-born Mexican Americans

**Supplementary Table S2** Associations between race/ethnicity and recurrence in ACR in Stage I RCC patients

|                                                                   | <b>Model 1</b>          |             | <b>Model 2</b>       |          | <b>Model 3</b>       |          |
|-------------------------------------------------------------------|-------------------------|-------------|----------------------|----------|----------------------|----------|
|                                                                   | <b>OR (95% C.I.)</b>    | <b>P</b>    | <b>OR (95% C.I.)</b> | <b>P</b> | <b>OR (95% C.I.)</b> | <b>P</b> |
| <b>Racial/ethnic minority groups vs. non-Hispanic Whites</b>      |                         |             |                      |          |                      |          |
| Non-Hispanic Whites                                               | Reference               |             | Reference            |          | Reference            |          |
| American Indians/Alaska Natives                                   | 1.09 (0.55-2.17)        | 0.80        | 0.86 (0.33-2.23)     | 0.76     | 0.93 (0.35-2.53)     | 0.96     |
| Hispanic Americans                                                | 1.04 (0.70-1.57)        | 0.84        | 0.90 (0.53-1.52)     | 0.90     | 1.02 (0.58-1.78)     | 0.96     |
|                                                                   |                         |             |                      |          |                      |          |
| <b>Mexican Americans vs. non-Hispanic Whites</b>                  |                         |             |                      |          |                      |          |
| Non-Hispanic Whites                                               | Reference               |             | Reference            |          | Reference            |          |
| Mexican Americans                                                 | <b>1.88 (1.07-3.30)</b> | <b>0.03</b> | 1.73 (0.85-3.51)     | 0.10     | 2.01 (0.95-4.25)     | 0.07     |
| <b>U.S./Mexico-born Mexican Americans vs. non-Hispanic Whites</b> |                         |             |                      |          |                      |          |
| Non-Hispanic Whites                                               | Reference               |             | Reference            |          | Reference            |          |
| U.S.-Born Mexican Americans                                       | 1.84 (0.81-4.20)        | 0.15        | 1.22 (0.36-4.14)     | 0.76     | 1.29 (0.37-4.53)     | 0.69     |
| Mexico-Born Mexican Americans                                     | 0.52 (0.12-2.17)        | 0.37        | 0.37 (0.05-2.75)     | 0.33     | 0.40 (0.05-3.03)     | 0.37     |

Regression models include age category, gender, marital status, RCC subtypes (exclude NOS), grade, and diagnosis year; Model 2 additionally adjust for nephrectomy type; Model 3 additionally adjust for % High School graduation and % Poverty.

**Supplementary Table S3** Impact of nephrectomy type on association between race/ethnicity and recurrence in Stage I RCC patients

|                                                              | <b>Radical</b>       |          | <b>Partial</b>       |          |                                |
|--------------------------------------------------------------|----------------------|----------|----------------------|----------|--------------------------------|
|                                                              | <b>OR (95% C.I.)</b> | <b>P</b> | <b>OR (95% C.I.)</b> | <b>P</b> | <b>P<sub>Interaction</sub></b> |
| <b>Racial/ethnic minority groups vs. non-Hispanic Whites</b> |                      |          |                      |          | <b>0.22</b>                    |
| Non-Hispanic Whites                                          | Reference            |          | Reference            |          |                                |
| American Indians/Alaska Natives                              | 0.51 (0.06-4.25)     | 0.51     | 1.18 (0.37-1.64)     | 0.83     |                                |
| Hispanic Americans                                           | 1.50 (0.65-3.46)     | 0.34     | 0.74 (0.33-1.64)     | 0.46     |                                |
|                                                              |                      |          |                      |          |                                |
| <b>Mexican Americans vs. non-Hispanic Whites</b>             |                      |          |                      |          | <b>0.28</b>                    |
| Non-Hispanic Whites                                          | Reference            |          | Reference            |          |                                |
| Mexican Americans                                            | 3.12 (1.00-9.76)     | 0.051    | 1.31 (0.46-3.71)     | 0.61     |                                |

Regression models include age category, gender, marital status, RCC subtypes (exclude NOS), grade, diagnosis year, nephrectomy type, % high school graduation and % Poverty.

Supplementary Table S4

Sub-distribution hazard regression analysis for RCC specific mortality in ACR

|                                    | Adjusted model 1        |                  | Adjusted model 2        |                  | Adjusted model 3        |                  | Adjusted model 4        |                  |
|------------------------------------|-------------------------|------------------|-------------------------|------------------|-------------------------|------------------|-------------------------|------------------|
|                                    | HR (95%CI)              | P                |
| <b>Surgical Treatment</b>          |                         |                  |                         |                  |                         |                  |                         |                  |
| Local Ablation or Nephrectomy      |                         |                  |                         |                  | Reference               |                  |                         |                  |
| No Treatment                       |                         |                  |                         |                  | <b>3.85 (1.74-8.52)</b> | <b>&lt;0.001</b> |                         |                  |
|                                    |                         |                  |                         |                  |                         |                  |                         |                  |
| <b>Nephrectomy Type</b>            |                         |                  |                         |                  |                         |                  |                         |                  |
| Partial Nephrectomy                |                         |                  |                         |                  |                         |                  | Reference               |                  |
| Radical Nephrectomy                |                         |                  |                         |                  |                         |                  | 1.49 (0.89-2.49)        | 0.13             |
|                                    |                         |                  |                         |                  |                         |                  |                         |                  |
| <b>Race/ethnicity</b>              |                         |                  |                         |                  |                         |                  |                         |                  |
| Non-Hispanic Whites                | Reference               |                  | Reference               |                  | Reference               |                  | Reference               |                  |
| American Indians/Alaska Native     | 0.77 (0.29-2.05)        | 0.60             | 0.63 (0.22-1.84)        | 0.40             | 0.56 (0.19-1.64)        | 0.29             | 0.23 (0.03-2.67)        | 0.14             |
| Hispanic Americans                 | 1.30 (0.77-2.20)        | 0.33             | 1.15 (0.66-2.01)        | 0.62             | 1.13 (0.66-1.96)        | 0.65             | 1.18 (0.63-2.21)        | 0.61             |
|                                    |                         |                  |                         |                  |                         |                  |                         |                  |
| <b>NHWs vs. Hispanic Americans</b> |                         |                  |                         |                  |                         |                  |                         |                  |
| Non-Hispanic Whites                | Reference               |                  | Reference               |                  | Reference               |                  | Reference               |                  |
| Mexican Americans                  | <b>3.07 (1.80-5.26)</b> | <b>&lt;0.001</b> | <b>2.84 (1.57-5.15)</b> | <b>&lt;0.001</b> | <b>2.62 (1.46-4.69)</b> | <b>&lt;0.01</b>  | <b>3.05 (1.55-6.00)</b> | <b>&lt;0.01</b>  |
|                                    |                         |                  |                         |                  |                         |                  |                         |                  |
| Non-Hispanic White                 | Reference               |                  | Reference               |                  | Reference               |                  |                         |                  |
| U.S.-Born Mexican Americans        | <b>3.97 (2.21-71.3)</b> | <b>&lt;0.001</b> | <b>3.95 (2.06-7.60)</b> | <b>&lt;0.001</b> | <b>3.47 (1.80-6.70)</b> | <b>&lt;0.001</b> | <b>4.02 (1.88-8.62)</b> | <b>&lt;0.001</b> |
| Foreign-Born Mexican Americans     | 0.53 (0.07, 3.98)       | 0.53             | 0.52 (0.07,3.87)        | 0.52             | 0.52 (0.07-3.88)        | 0.52             | 0.71 (0.09-5.51)        | 0.74             |

Model 1: Adjusted for age category, gender, marital status, RCC subtypes (excluding NOS), grade (1 and 2 vs. 3 and 4), diagnosis year (categorical)

Model 2: Adjusted for age category, gender, marital status, RCC subtypes (excluding NOS), grade (1 and 2 vs. 3 and 4), diagnosis year (categorical), % High School graduation, and % Poverty

Model 3: Model 2 + no surgical treatment vs. treatment

Model 4: Model 2 + radical vs. partial nephrectomy

Supplementary Table S5

Impact of nephrectomy type on association between race/ethnicity and overall mortality

|                                    | <b>Radical</b>          |                  | <b>Partial</b>          |                  |                                       |
|------------------------------------|-------------------------|------------------|-------------------------|------------------|---------------------------------------|
|                                    | <b>HR (95%CI)</b>       | <b>P</b>         | <b>HR (95%CI)</b>       | <b>P</b>         | <b><i>P</i><sub>Interaction</sub></b> |
| <b>Race/ethnicity</b>              |                         |                  |                         |                  | 0.86                                  |
| Non-Hispanic Whites                | Reference               |                  | Reference               |                  |                                       |
| American Indians/Alaska Native     | 1.29 (0.71-2.34)        | 0.40             | 1.72 (0.83-3.56)        | 0.15             |                                       |
| Hispanic Americans                 | 1.22 (0.83-1.79)        | 0.31             | 1.20 (0.74-1.93)        | 0.46             |                                       |
|                                    |                         |                  |                         |                  |                                       |
| <b>NHWs vs. Hispanic Americans</b> |                         |                  |                         |                  | 0.65                                  |
| Non-Hispanic Whites                | Reference               |                  | Reference               |                  |                                       |
| Mexican Americans                  | <b>2.41 (1.56-3.72)</b> | <b>&lt;0.001</b> | <b>2.37 (1.37-4.09)</b> | <b>&lt;0.001</b> |                                       |
|                                    |                         |                  |                         |                  | 0.73                                  |
| Non-Hispanic White                 | Reference               |                  |                         |                  |                                       |
| U.S.-Born Mexican Americans        | <b>3.70 (2.25-6.10)</b> | <b>&lt;0.001</b> | <b>3.89 (2.09-7.25)</b> | <b>&lt;0.001</b> |                                       |
| Foreign-Born Mexican Americans     | 1.76 (0.79-3.94)        | 0.17             | 1.56 (0.63-3.84)        | 0.33             |                                       |

Adjusted for age category, gender, marital status, RCC subtypes (excluding NOS), grade (1 and 2 vs. 3 and 4), diagnosis year (categorical), % High School graduation, and % Poverty
